# Supplementary material
Source: publisher figshare collection journal article supplement (https://tandf.figshare.com/ndownloader/files/16840112)
Supplement: Supplementary file 1 [file 16840112]

```
/*program for figure 1 power for normality assessment*/
```

```
libname t1 "";/*set the folder where to save output*/
```

```
/*set here the folder where to save logs and outputs*/
```

```
proc printto log =";run;
```

```
proc printto print="";run;
```

```
%let rep=1;/*number of replicates for simulations n>5000 recommended*/
```

```
%macro gen;
```

```
%do obs=2 %to 50 ; /*number of observations*/
```

```
data a&obs;
```

```
do rep=1 to &rep; /*number of replicates*/
```

```
do obs=1 to &obs;
```

```
y=RAND('UNIFORM') ;output; /*shape of the distribution change according to
```

```
http://support.sas.com/documentation/cdl/en/lrdict/64316/HTML/default/viewer.htm#a001466748.htm*/
```

```
end;
```

```
end;
```

```
run;
```

```
data GOF&obs;Test="XXXXXXXXXXXXXXXXXXXXXXXXX";run;
```

```
%end;
```

```
%mend;
```

```
%gen;
```

```
/*perform the test of normality*/
```

```
%macro norm;
```

```
%do rep=1 %to &rep; /*number of replicates */
```

```
%do obs=2 %to 25 ;/*number of observations*/
```

```

proc univariate data=a&obs normal;where rep=&rep;
ods output TestsForNormality=GOF&obs._&rep;
run;

data GOF&obs._&rep;set GOF&obs._&rep;rep=&rep;run;

data GOF&obs;set GOF&obs GOF&obs._&rep;if pValue=. then delete;if VarName="obs" then
delete;run;

data GOF&obs;set GOF&obs;

result=0;

if pSign=">" then result=1;

if pSign=" " & pValue>0.05 then result=1;

if Test="XXXXXXXXXXXXXXXXXXXXXXX" then delete;

run;

proc means data=GOF&obs noprint;class TestLab rep;var result;output out=X&obs sum=sum
mean=mean;run;

data t1.nor&obs;set X&obs;if TestLab="" or rep^=. then delete;drop rep; rename mean=
error_rate;run;

      %end;

%end;

%mend;

%norm;

proc datasets lib=work nolist kill;run;quit; /*clean the work library*/

/*examples for power calculation*/

*t-test equal variances;

proc power;

  twosamplemeans test=diff

  meandiff = 0.3 0.5 0.8 /*cohen's d standardized effect sizes */

  stddev = 1

  npergroup = 10 to 50 by 5

  power = .;

  plot x=n; /*perform the plot*/

```

```
run;
```

```
*t-test unequal variances;
```

```
proc power;
```

```
twosamplemeans test=test=diff_satt
```

```
meandiff = 0.3 0.5 0.8 /*cohen's d standardized effect sizes */
```

```
stddev = 1
```

```
npergroup = 10 to 50 by 5
```

```
power = .;
```

```
plot x=n; /*perform the plot*/
```

```
run;
```

```
/*non parametric comparisons*/
```

```
proc power;
```

```
twosamplewilcoxon
```

```
vardist("uniform1") = uniform (0, 1)
```

```
vardist("uniform2") = uniform (0.2, 1.2)
```

```
variables = "uniform1" | "uniform2"
```

```
ntotal = 10 to 50 by 5
```

```
power = .;
```

```
plot x=n;
```

```
run;
```

```
/*example how to compute power for different distributions*/
```

```
/*check sas proc power at
```

```
https://support.sas.com/documentation/cdl/en/statug/63962/HTML/default/viewer.htm#statug\_power\_sect015.htm*/
```

```
vardist("ordinal")      = ordinal ((0 1 2) : (.2 .3 .5))
```

```
vardist("beta")          = beta (1, 2)
```

```
vardist("binomial")      = binomial (.3, 3)
```

```

vardist("exponential") = exponential (2)
vardist("gamma")       = gamma (1.5, 2)
vardist("laplace")     = laplace (1, 2)
vardist("logistic")    = logistic (1, 2)
vardist("lognormal")   = lognormal (1, 2)
vardist("normal")      = normal (3, 2)
vardist("poisson")     = poisson

```

```

/*one way analysis of variance*/;

```

```

*test on linear contrast between groups;

```

```

proc power;

```

```

onewayanova test=contrast

```

```

contrast = (1 0 -1)          /*coefficient for linear contrasts*/

```

```

groupmeans = -0.5 | 0 | +0.5 /*note mean1-mean3/stddev as Cohen's d*/

```

```

stddev = 1

```

```

npergroup = 10 to 50 by 5

```

```

power = .;

```

```

plot x=n;

```

```

run;

```

```

*test on omnibus test (F snedecor);

```

```

proc power;

```

```

onewayanova test=overall

```

```

contrast = (1 0 -1)

```

```

groupmeans = -0.5 | 0 | +0.5 /*note mean1-mean3/stddev as Cohen's d*/

```

```

stddev = 1

```

```

npergroup = 10 to 50 by 5

```

```

power = .;

```

```

run;

```

```

/*comparison between two proportion by Fisher's exact test*/
proc power;

  twosamplefreq test=fisher /*use "chisq" for ordinary chi-squared test*/
    groupproportions = (.35 .15)
    npergroup = 10 to 50 by 10
    power = .;
    plot x=n;
run;

/*repeated measures ANOVA*/

data use;/*step 1 create a dataset with means by groups*/
  input Treatment $ out1 out2 out3 out4;/*outcomes variables 4 time points*/
  datalines;
  groupA  1  1      1      1
  groupB  1  1.5 2    2.5
;run;

proc glmpower data=use;/*step 2 declare other parameters*/
  class Treatment;
  model out1 out2 out3 out4 = Treatment;
  repeated Time contrast;
  power
    mtest = hlt
    alpha = 0.05
    power = .
    ntotal = 10 to 50 by 10
    stddev = 1
    MATRIX ("corr") = (1                                     /*define the correlation matrix
among measures*/

```

0.2 1

0.2 0.2 1

0.2 0.2 0.2 1)

corrmat = "corr";

plot x=n;

run;
